# Supplementary material
Source: PubMed Central journal article supplement (PMC3486515)
Supplement: NIHMS407002-supplement-1.pdf [file NIHMS407002-supplement-1.pdf]

Appendix:

Supplementary Data

Methods

Flavopiridol protein binding was measured in patient PK samples using an HTD 96 re-usable micro-equilibrium dialysis device (HTDialysis, Gales Ferry, CT). Plasma samples (100  $\mu$ l) were loaded into one side of each well (wells were divided by pre-equilibrated 12-14 kDa membranes) and incubated for 6 hours at room temperature against an equal volume of phosphate buffered saline. Plasma and saline were removed, their volumes measured, and then each was processed for LC-MS/MS analysis. Protein binding was calculated with the formula,  $\frac{((S-B) \cdot (N/100))}{(((S-B) \cdot (N/100)) + B)} \cdot 100$ , where S and B are concentrations of flavopiridol on the sample and buffer sides of the dialysis membrane, respectively, and N is the final volume of plasma.

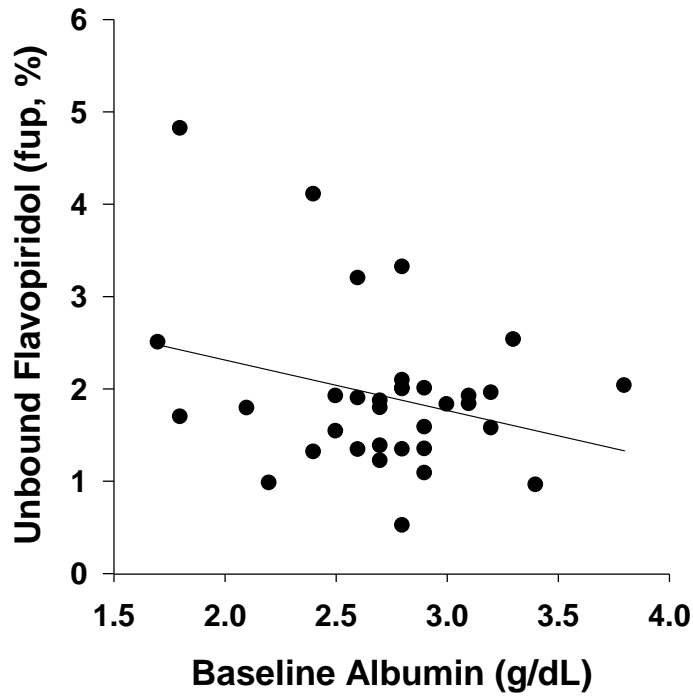

Supplementary Figure 1. Baseline albumin vs. free flavopiridol. No apparent relationship is observed ( $R^2 = .08$ ).

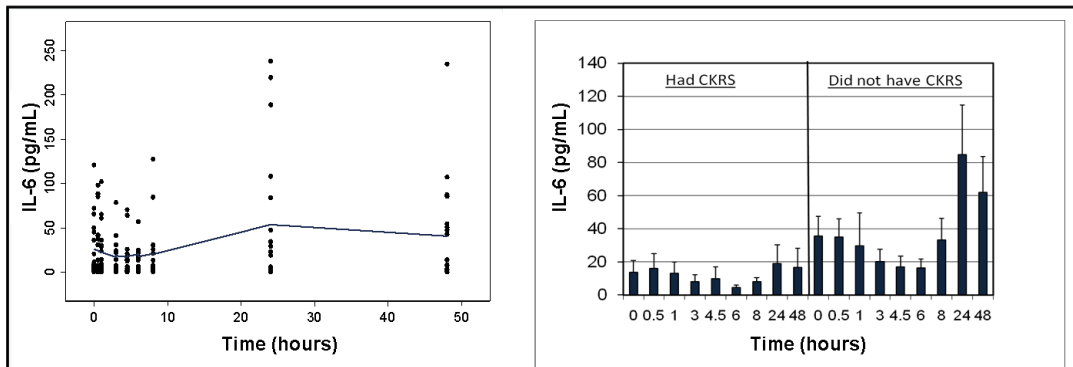

Supplementary Figure 2. Serum IL-6 levels as a function of time following flavopiridol infusion. Left panel shows all measurable IL-6 serum concentrations (pg/mL). Right panel shows relationship between serum IL-6 and reported CKRS.
